# Supplementary material for: Cobalt/rhodium heterobimetallic nanoparticle-catalyzed carbonylative [2+2+1] cycloaddition of allenes and bisallenes to Pauson–Khand-type reaction products
Source: Royal Society of Chemistry journal article supplement (doi:10.1039/b718107h), 2008-01-01
Supplement: b718107h.pdf [file b718107h.pdf]

*Electronic Supplementary Information for Chemical Communications*

**Cobalt/Rhodium Heterobimetallic Nanoparticle-catalyzed Carbonylative  
[2+2+1] Cycloaddition of Allenes and Bisallenens to Pauson-Khand-Type  
Reaction Products**

Ji Hoon Park, Eunha Kim, Hyeong Mook Kim, Soo Young Choi, and Young Keun Chung\*

*Intelligent Textile System Research Center, Department of Chemistry, College of Natural Sciences,  
Seoul National University, Seoul 151-747, Korea*

-Table of Contents-

|                                                                                                                                     |    |
|-------------------------------------------------------------------------------------------------------------------------------------|----|
| I. General Information                                                                                                              | S2 |
| II. General procedure for Co <sub>2</sub> Rh <sub>2</sub> -Catalyzed Carbonylative [2+2+1] Cycloaddition of Allenes and Bisallenens | S2 |
| III. Synthesis and Immobilization of Metal Nanoparticles on Charcoal                                                                | S3 |
| IV. Preparation of allenens and bisallenens                                                                                         | S3 |
| V. X-ray analysis                                                                                                                   | S3 |
| VI. Reference                                                                                                                       | S4 |
| VII. Characterization of new compounds                                                                                              | S5 |

## I. General Informaiton

Workup procedures were done in air. Toluene was freshly distilled from sodium prior to use. Liquid was transferred via a syringe or a cannula. Unless otherwise noted, all commercial materials were used without purification. Reactions were monitored by thin-layer chromatography carried out on 0.25 mm E. Merck silica gel plates (60F-254) using UV light as a visualizing agent and acidic *p*-anisaldehyde and heat as a developing procedure. Flash chromatography was carried out on Merck 60 silica gel (230 – 400 mesh). <sup>1</sup>H and <sup>13</sup>C NMR spectra were recorded with Bruker (300 MHz) spectrometer. <sup>1</sup>H NMR spectra were referenced to residual TMS (0 ppm) and reported as follows: chemical shift, multiplicity (s = singlet, d = doublet, t = triplet, m = multiplet). Chemical shifts of the <sup>13</sup>C NMR spectra were measured relative to CDCl<sub>3</sub> (77.23 ppm). Mass spectral data were obtained from the Korea Basic Science Institute (Daegu) on a Jeol JMS 700 high resolution mass spectrometer. Infrared spectra were recorded on a Shimadzu IR-470 spectrometer. Single crystal data for **1b** and **1c** were collected on an Enraf-Nonius CCD single crystal X-ray diffractometer at room temperature using graphite-monochromated Mo K $\alpha$  radiation ( $\lambda = 0.71073 \text{ \AA}$ ). Structures were solved by direct methods using SHELXS-97 and refined by full-matrix least-squares with SHELXL-97. Compounds **1a**,<sup>1</sup> **2a**,<sup>2</sup> **3a**,<sup>3</sup> **4a**,<sup>4</sup> **5a**,<sup>5</sup> **6a**,<sup>6</sup> **7a**,<sup>7</sup> **8a**,<sup>8</sup> **9a**,<sup>9</sup> **13a**,<sup>10</sup> **14a**, and **14b**<sup>11</sup> were known.

## II. General procedure for Co<sub>2</sub>Rh<sub>2</sub>-Catalyzed Carbonylative [2+2+1] Cycloaddition of Allenes and Bisallenenes

### 1. Intermolecular Carbonylative [2+2+1] Cycloaddition of Allenes

Phenylallene **1a** (1.0 mmol, 116 mg), 5 mol % Co<sub>2</sub>Rh<sub>2</sub> (45 mg of the immobilized Co<sub>2</sub>Rh<sub>2</sub>), and toluene (5 mL) were placed in a 100 mL stainless steel autoclave equipped with a stirring bar. The reactor was charged with 2 atm of CO and heated at 130°C for 6 h. After the reactor was cooled to room temperature, the solution was filtered and concentrated, and the product was isolated by chromatography on a silica gel column eluting with hexane and ethyl acetate (v/v, 4 : 1).

### 2. Intramolecular Carbonylative [2+2+1] Cycloaddition of BisAllenenes

Bisallene **9a** (0.3 mmol, 83 mg), 5 mol % Co<sub>2</sub>Rh<sub>2</sub> (27 mg of the immobilized Co<sub>2</sub>Rh<sub>2</sub>), and toluene (3 mL) were placed in a 100 mL stainless steel autoclave equipped with a stirring bar. The reactor was charged with 2 atm of CO and heated at 100°C for 4 h. After the reactor was cooled to room temperature, the solution was filtered and concentrated, and the product was isolated by chromatography on a silica gel column eluting with hexane and ethyl acetate (v/v, 1 : 2).

#### -**10b**, **11b**, and **12b**

For **10b**, **11b**, and **12b**, two regioisomers could be formed depending upon the direction of double bond shift within the proposed mechanism. However, only one regioisomer was formed. The two possible regioisomers could be easily discriminated by the <sup>1</sup>H NMR peaks of the vinyl protons. In the case of **10b**, the vinyl proton on the seven-membered ring appears as doublet. It means that there exists only one proton next to this vinyl proton. Thus, one of the two double bonds in **10b** is located close to the carbon with the methyl group. In the cases of **11b** and **12b**, the number of vinyl proton can be one or two depending on the regioisomer formed. According to the <sup>1</sup>H NMR spectra of **11b** and **12b**, there is only one vinyl proton. It means that one of the double bonds is located at the carbon with a substituent. Thus, we can easily establish the structure of the regioisomer.

## III. Synthesis and Immobilization of Metal Nanoparticles on Charcoal

To a two-neck flask were added *o*-dichlorobenzene (24 mL), oleic acid (0.2 mL), and trioctylphosphine oxide (0.4 g). While the solution was heated at 180°C, a solution of metal carbonyl, Co<sub>2</sub>Rh<sub>2</sub>(CO)<sub>12</sub> (1.0 g), in 6 mL *o*-dichlorobenzene was injected into the flask. The resulting solution was heated to 180°C for 2 h and then concentrated to a volume of 5 mL. The concentrated solution was cooled to room temperature. To the cooled solution was added 25 mL of THF. After the solution was well stirred for 10 min, flame-dried charcoal (2.0 g) was added to the solution. After the resulting solution was refluxed for 12 h, the precipitates were filtered and washed with diethyl ether (20 mL), dichloromethane (20 mL), acetone (20 mL), and methanol (20 mL). Vacuum drying gave a black solid.



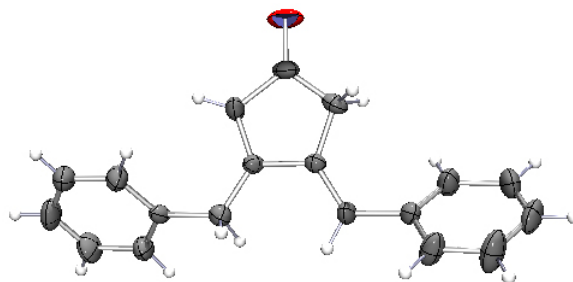

An ORTEP drawing of **1b** with 30% probability of thermal ellipsoids.

Crystal data for **1c**: C<sub>19</sub>H<sub>16</sub>O (293K). M = 260.32, monoclinic, space group P2<sub>1</sub>/c, *a* = 11.6112(5) Å, *b* = 6.3622(3) Å, *c* = 19.4174(6) Å, β = 91.098(2)°, V = 1434.15(10) Å<sup>3</sup>, Z = 4, ρ<sub>calc.</sub> = 1.206 g/cm<sup>-3</sup>, absorption coefficient = 0.073 mm<sup>-1</sup>, total reflections collected 5891, unique 3231 (R<sub>int</sub> = 0.0199), GOF = 1.033, R<sub>1</sub> = 0.0442, R<sub>w</sub> = 0.1019 (I > 2σ(I)).

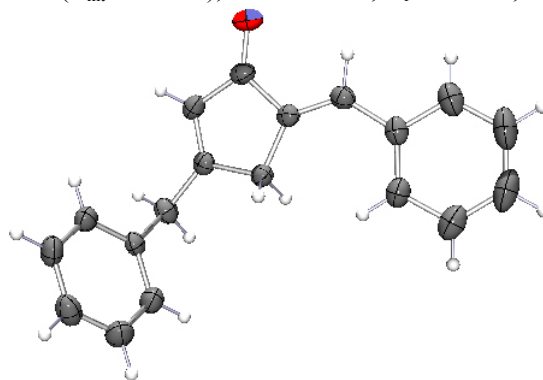

An ORTEP drawing of **1c** with 30% probability of thermal ellipsoids.

## VI. Reference

- (1) S. Searles, Y. Li, B. Nassim, M.-T. Robert-Lopes, P. T. Tran, and P. Crabbe, *J. Chem. Soc., Perkin Trans. 1* 1984, 747-751.
- (2) I. Martinez, A. E. Andrews, J. D. Emch, A. J. Ndakala, J. Wang, and A. R. Howell, *Org. Lett.* 2003, **5**, 399-402.
- (3) H. Nakamura, S. Tashiro, and T. Tmakura, *Tetrahedron Lett.* 2005, **46**, 8333-8336.
- (4) K. Lee, D. Seomoon, and P. H. Lee, *Angew. Chem. Int. Ed.* 2002, **41**, 3901-3903.
- (5) V. Mouries, B. Delouvie, E. Lacote, L. Fensterbank, and M. Malacria, *Eur. J. Org. Chem.* 2002, 1776-1787.
- (6) H. Nakamura, T. Kamakura, and S. Onagi, *Org. Lett.* 2006, **8**, 2095-2098.
- (7) C. W. Huang, M. Shanmugasundaram, H.-M. Chang, and C.-H. Cheng, *Tetrahedron* 2003, **59**, 3635-3641.
- (8) T. Endo, K. Takagi, and I. Tomita, *Tetrahedron* 1997, **53**, 15187-15196.
- (9) S.-K. Kang, T.-G. Baik, A. N. Kulak, Y.-H. Ha, Y. Lim, and J. Park, *J. Am. Chem. Soc.* 2000, **122**, 11529-11530.
- (10) S.-K. Kang, Y.-H. Ha, D.-H. Kim, Y. Lim, and J. Jung, *Chem. Commun.* 2001, 1306-1307.
- (11) P. Lu and S. Ma, *Org. Lett.* 2007, **9**, 2095-2097.

## VII. Characterization of new compounds

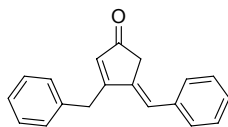

(*E*)-3-benzyl-4-benzylidenecyclopent-2-enone (**1b**)

**IR** ( $\nu_{\text{CO}}$ ): 1685  $\text{cm}^{-1}$ .  **$^1\text{H NMR}$**  (300 MHz,  $\text{CDCl}_3$ )  $\delta$  3.32 (s, 2 H), 3.94 (s, 2 H), 5.93 (s, 1 H), 6.78 (s, 1H), 7.23-7.44 (m, 10 H) ppm.  **$^{13}\text{C NMR}$**  (75 MHz,  $\text{CDCl}_3$ )  $\delta$  35.0, 40.6, 125.5, 127.1, 128.4, 128.9, 129.0, 129.1, 129.4, 132.3, 136.2, 137.1, 137.2, 174.1, 204.6 ppm. **HRMS (EI)** calc. for  $[\text{C}_{19}\text{H}_{16}\text{O}]^+$  260.1201, found 260.1204.

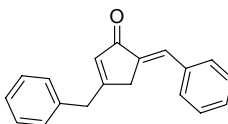

(*E*)-3-benzyl-5-benzylidenecyclopent-2-enone (**1c**)

**IR** ( $\nu_{\text{CO}}$ ): 1692  $\text{cm}^{-1}$ .  **$^1\text{H NMR}$**  (300 MHz,  $\text{CDCl}_3$ )  $\delta$  3.43 (s, 2 H), 3.81 (s, 2 H), 6.17 (s, 1 H), 7.21-7.52 (m, 11 H) ppm.  **$^{13}\text{C NMR}$**  (75 MHz,  $\text{CDCl}_3$ )  $\delta$  36.6, 39.9, 127.2, 128.9, 129.0, 129.2, 129.5, 130.4, 130.9, 131.9, 133.9, 135.3, 136.8, 173.8, 197.4 ppm. **HRMS (EI)** calc. for  $[\text{C}_{19}\text{H}_{16}\text{O}]^+$  260.1201, found 260.1201.

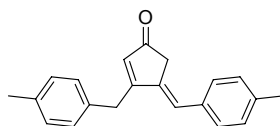

(*E*)-3-(4-methylbenzyl)-4-(4-methylbenzylidene)cyclopent-2-enone (**2b**)

**IR** ( $\nu_{\text{CO}}$ ): 1684  $\text{cm}^{-1}$ .  **$^1\text{H NMR}$**  (300 MHz,  $\text{CDCl}_3$ )  $\delta$  2.33 (s, 3 H), 2.36 (s, 3 H), 3.35 (m, 2 H), 3.90 (s, 2 H), 5.92 (s, 1 H), 6.76 (s, 1 H), 7.13 (s, 4 H), 7.19 (d,  $J = 8.1$  Hz, 2 H), 7.32 (d,  $J = 8.2$  Hz, 2 H) ppm.  **$^{13}\text{C NMR}$**  (75 MHz,  $\text{CDCl}_3$ )  $\delta$  21.2, 21.5, 34.6, 40.8, 125.4, 129.0, 129.5, 129.7, 129.8, 132.0, 133.6, 134.3, 136.4, 136.7, 138.6, 174.6, 204.8 ppm. **HRMS (EI)** calc. for  $[\text{C}_{21}\text{H}_{20}\text{O}]^+$  288.1514, found 288.1515.

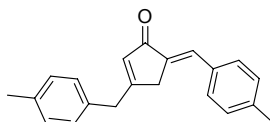

(*E*)-3-(4-methylbenzyl)-5-(4-methylbenzylidene)cyclopent-2-enone (**2c**)

**IR** ( $\nu_{\text{CO}}$ ): 1679  $\text{cm}^{-1}$ .  **$^1\text{H NMR}$**  (300 MHz,  $\text{CDCl}_3$ )  $\delta$  2.35 (s, 3 H), 2.37 (s, 3 H), 3.41 (s, 2 H), 3.78 (s, 2 H), 6.18 (s, 1 H), 7.11 (d,  $J = 8.0$  Hz, 2 H), 7.15 (d,  $J = 7.8$  Hz, 2 H), 7.20 (d,  $J = 8.0$  Hz, 2 H), 7.31 (s, 1 H), 7.41 (d,  $J = 8.0$  Hz, 2 H) ppm.  **$^{13}\text{C NMR}$**  (75 MHz,  $\text{CDCl}_3$ )  $\delta$  21.3, 21.7, 36.7, 39.6, 129.1, 129.7, 129.8, 130.5, 131.0, 131.8, 132.7, 133.1, 133.8, 136.9, 139.9, 173.8, 197.6 ppm. **HRMS (EI)** calc. for  $[\text{C}_{21}\text{H}_{20}\text{O}]^+$  288.1514, found 288.1515.

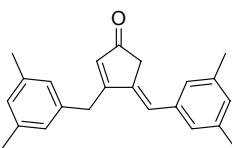

(*E*)-3-(3,5-dimethylbenzyl)-4-(3,5-dimethylbenzylidene)cyclopent-2-enone (**3b**)

**IR** ( $\nu_{\text{CO}}$ ): 1684  $\text{cm}^{-1}$ .  **$^1\text{H NMR}$**  (300 MHz,  $\text{CDCl}_3$ )  $\delta$  2.30 (s, 6 H), 2.33 (s, 6 H), 3.34 (s, 2 H), 3.85 (s, 2 H), 5.94 (s, 1 H), 6.73 (s, 1 H), 6.84 (s, 2 H), 6.90 (s, 1 H), 6.95 (s, 1 H), 7.05 (s, 2 H) ppm.  **$^{13}\text{C NMR}$**  (75 MHz,  $\text{CDCl}_3$ )  $\delta$  21.4, 21.5, 34.8, 40.9, 125.7, 127.0, 127.4(2), 127.4(3), 128.7, 130.3, 132.1, 136.3, 137.0, 137.2, 138.5, 174.6, 205.0 ppm. **HRMS (EI)** calc. for  $[\text{C}_{23}\text{H}_{24}\text{O}]^+$  316.1827, found 316.1822.

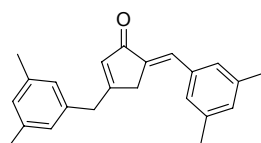

(*E*)-3-(3,5-dimethylbenzyl)-5-(3,5-dimethylbenzylidene)cyclopent-2-enone (**3c**)

**IR** ( $\nu_{\text{CO}}$ ): 1681  $\text{cm}^{-1}$ .  **$^1\text{H NMR}$**  (300 MHz,  $\text{CDCl}_3$ )  $\delta$  2.31 (s, 6 H), 2.34 (s, 6 H), 3.44 (s, 2 H), 3.75 (s, 2 H), 6.17 (s, 1 H), 6.84 (s, 2 H), 6.91 (s, 1 H), 6.99 (s, 1 H), 7.13 (s, 2 H), 7.29 (s, 1 H) ppm.  **$^{13}\text{C NMR}$**  (75 MHz,  $\text{CDCl}_3$ )  $\delta$  21.4, 21.5, 36.9, 39.8, 127.0, 127.4, 128.4, 128.9, 131.4, 132.0, 133.8, 135.5, 136.8, 138.5, 138.6, 173.9, 197.6 ppm. **HRMS (EI)** calc. for  $[\text{C}_{23}\text{H}_{24}\text{O}]^+$  316.1827, found 316.1824.

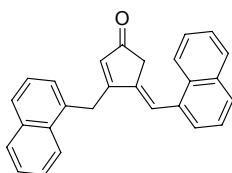

(*E*)-3-(naphthalen-1-ylmethyl)-4-(naphthalen-1-ylmethylene)cyclopent-2-enone (**4b**)

**IR (ν<sub>CO</sub>):** 1682 cm<sup>-1</sup>. **<sup>1</sup>H NMR (300 MHz, CDCl<sub>3</sub>)** δ 3.26 (s, 2 H), 4.51 (s, 2 H), 5.80 (s, 1 H), 7.47-7.55 (m, 9 H), 7.82-7.97 (m, 6 H) ppm. **<sup>13</sup>C NMR (75 MHz, CDCl<sub>3</sub>)** δ 32.7, 40.2, 122.7, 123.9, 124.1, 125.6, 125.8, 126.2, 126.4, 126.5, 126.7, 126.8, 127.6, 128.3, 128.9, 129.0, 129.2, 132.0, 132.1, 133.3, 133.5, 133.7, 133.9, 134.3, 139.7, 172.8, 204.6 ppm. **HRMS (EI)** calc. for [C<sub>27</sub>H<sub>20</sub>O]<sup>+</sup> 360.1514, found 360.1517.

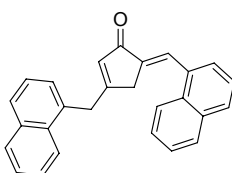

(*E*)-3-(naphthalen-1-ylmethyl)-5-(naphthalen-1-ylmethylene)cyclopent-2-enone (**4c**)

**IR (ν<sub>CO</sub>):** 1688 cm<sup>-1</sup>. **<sup>1</sup>H NMR (300 MHz, CDCl<sub>3</sub>)** δ 3.40 (s, 2 H), 4.19 (s, 2 H), 6.12 (s, 1 H), 7.30-7.54 (m, 8 H), 7.80-7.87 (m, 5 H), 8.11 (m, 2 H) ppm. **<sup>13</sup>C NMR (75 MHz, CDCl<sub>3</sub>)** δ 36.6, 37.5, 123.8, 124.3, 125.2, 125.4, 125.7, 126.1, 126.4, 126.6, 126.7, 126.9, 127.7, 128.1, 128.2, 128.8, 129.1, 129.7, 132.0, 132.4, 132.5, 133.0, 133.8, 134.2, 136.3, 174.5, 196.6 ppm. **HRMS (EI)** calc. for [C<sub>27</sub>H<sub>20</sub>O]<sup>+</sup> 360.1514, found 360.1511.

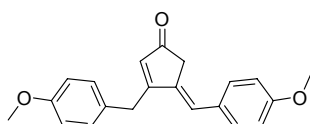

(*E*)-3-(4-methoxybenzyl)-4-(4-methoxybenzylidene)cyclopent-2-enone (**5b**)

**IR (ν<sub>CO</sub>):** 1675 cm<sup>-1</sup>. **<sup>1</sup>H NMR (300 MHz, CDCl<sub>3</sub>)** δ 3.30 (s, 2 H), 3.80 (s, 3 H), 3.84 (s, 3 H), 3.88 (s, 2 H), 5.89 (s, 1 H), 6.73 (s, 1 H), 6.87 (d, *J* = 8.5 Hz, 2 H), 6.92 (d, *J* = 8.8 Hz, 2 H), 7.15 (d, *J* = 8.4 Hz, 2 H), 7.38 (d, *J* = 8.8 Hz, 2 H) ppm. **<sup>13</sup>C NMR (75 MHz, CDCl<sub>3</sub>)** δ 34.2, 40.8, 55.5, 55.7, 113.9, 114.1, 114.4, 114.6, 125.1, 130.1, 130.2, 130.3, 131.0, 131.4, 135.0, 175.0, 204.9 ppm. **HRMS (EI)** calc. for [C<sub>21</sub>H<sub>20</sub>O<sub>3</sub>]<sup>+</sup> 320.1412, found 320.1414.

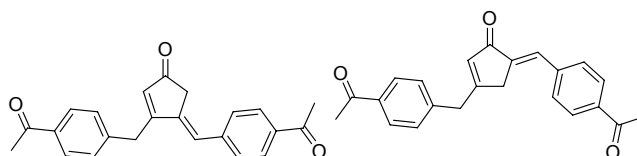

(*E*)-1,1'-(4,4'-(4-oxocyclopent-2-ene-2-yl-1-ylidene)bis(methylene)bis(4,1-phenylene))diethanone (**6b**)

(*E*)-1,1'-(4,4'-(5-oxocyclopent-3-ene-3-yl-1-ylidene)bis(methylene)bis(4,1-phenylene))diethanone (**6c**)

**IR (ν<sub>CO</sub>):** 1712, 1682 cm<sup>-1</sup>. **<sup>1</sup>H NMR (300 MHz, CDCl<sub>3</sub>)** δ 2.61 (s, 25.2 H), 3.35 (s, 6.4 H, 6b), 3.47 (s, 2 H, 6c), 3.91 (s, 2 H, 6c), 4.04 (s, 6.4 H, 6b), 5.99 (s, 3.2 H, 6b), 6.19 (s, 1 H, 6c), 6.80 (s, 3.2 H, 6b), 7.34 (s, 1 H, 6c), 7.36 (d, *J* = 8.2 Hz, 8.4 H), 7.50 (d, *J* = 8.2 Hz, 6.4 H, 6b), 7.58 (d, *J* = 8.2 Hz, 2 H, 6c), 7.94 (d, *J* = 7.8 Hz, 8.4 H), 7.97 (d, *J* = 8.2 Hz, 8.4 H) ppm. **<sup>13</sup>C NMR (75 MHz, CDCl<sub>3</sub>)** δ 26.7(6), 26.7(8), 26.7(9), 34.9, 36.6, 39.8, 40.5, 124.4, 128.9, 129.0, 129.2, 129.4, 129.5, 129.8, 130.4, 131.1, 132.3, 133.5, 135.7, 136.4, 136.5, 137.3, 139.8, 140.5, 142.0, 142.5, 172.3, 172.6, 196.5, 197.4(1), 197.4(3), 197.6, 203.6 ppm. **HRMS (EI)** calc. for [C<sub>23</sub>H<sub>20</sub>O<sub>3</sub>]<sup>+</sup> 344.1412, found 344.1412.

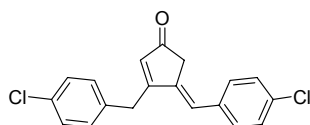

(*E*)-3-(4-chlorobenzyl)-4-(4-chlorobenzylidene)cyclopent-2-enone (**7b**)

**IR (ν<sub>CO</sub>):** 1684 cm<sup>-1</sup>. **<sup>1</sup>H NMR (300 MHz, CDCl<sub>3</sub>)** δ 3.29 (s, 2 H), 3.91 (s, 2 H), 5.93 (s, 1 H), 6.69 (s, 1 H), 7.17 (d, *J* = 8.3 Hz, 2 H), 7.30-7.38 (m, 6 H) ppm. **<sup>13</sup>C NMR (75 MHz, CDCl<sub>3</sub>)** δ 34.3, 40.5, 124.2, 129.2, 129.3, 130.5, 130.6, 132.7, 133.1, 134.5, 134.6, 135.5, 137.6, 173.1, 203.9 ppm. **HRMS (EI)** calc. for [C<sub>19</sub>H<sub>14</sub>Cl<sub>2</sub>O]<sup>+</sup> 328.0422, found 328.0424.

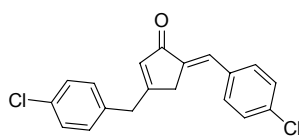

(*E*)-3-(4-chlorobenzyl)-5-(4-chlorobenzylidene)cyclopent-2-enone (**7c**)

**IR** ( $\nu_{\text{CO}}$ ): 1685  $\text{cm}^{-1}$ .  **$^1\text{H NMR}$**  (300 MHz,  $\text{CDCl}_3$ )  $\delta$  3.38 (s, 2 H), 3.79 (s, 2 H), 6.16 (s, 1 H), 7.16 (m, 2 H), 7.33 (m, 5 H), 7.42 (m, 2 H) ppm.  **$^{13}\text{C NMR}$**  (75 MHz,  $\text{CDCl}_3$ )  $\delta$  36.5, 39.2, 129.2, 129.3, 129.8, 130.5, 131.5, 132.1, 133.3, 133.8, 134.1, 135.1, 135.6, 172.9, 196.8 ppm. **HRMS (EI)** calc. for  $[\text{C}_{19}\text{H}_{14}\text{Cl}_2\text{O}]^+$  328.0422, found 328.0424.

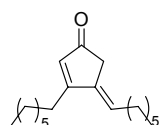

(*E*)-3-heptyl-4-heptylidene-cyclopent-2-enone (**8b**)

**IR** ( $\nu_{\text{CO}}$ ): 1681  $\text{cm}^{-1}$ .  **$^1\text{H NMR}$**  (300 MHz,  $\text{CDCl}_3$ )  $\delta$  0.89 (t,  $J = 6.7$  Hz, 6 H), 1.30 (m, 14 H), 1.45 (m, 2 H), 1.59 (m, 2 H), 2.15 (dd,  $J = 7.4$  Hz, 14.7 Hz, 2 H), 2.47 (t,  $J = 7.6$  Hz, 2 H), 2.91 (s, 2 H), 5.82 (t,  $J = 7.6$  Hz, 1 H), 6.03 (s, 1 H) ppm.  **$^{13}\text{C NMR}$**  (75 MHz,  $\text{CDCl}_3$ )  $\delta$  14.3, 22.7, 22.8, 22.9, 28.1, 28.2, 29.3, 29.7, 30.3, 31.8, 31.9, 38.5, 127.3, 130.6, 137.6, 174.9, 205.3 ppm. **HRMS (EI)** calc. for  $[\text{C}_{19}\text{H}_{32}\text{O}]^+$  276.2453, found 276.2451.

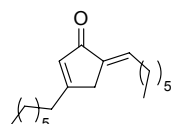

(*E*)-3-heptyl-5-heptylidene-cyclopent-2-enone (**8c**)

**IR** ( $\nu_{\text{CO}}$ ): 1688  $\text{cm}^{-1}$ .  **$^1\text{H NMR}$**  (300 MHz,  $\text{CDCl}_3$ )  $\delta$  0.89 (m, 6 H), 1.31 (m, 14 H), 1.47 (m, 2 H), 1.60 (m, 2 H), 2.18 (dd,  $J = 7.3$  Hz, 14.7 Hz, 2 H), 2.44 (t,  $J = 7.6$  Hz, 2 H), 3.08 (s, 2 H), 6.11 (t,  $J = 1.4$  Hz, 1 H), 6.53 (tt,  $J = 1.8$  Hz, 7.6 Hz, 1 H) ppm.  **$^{13}\text{C NMR}$**  (75 MHz,  $\text{CDCl}_3$ )  $\delta$  14.3, 22.7, 22.8, 27.3, 28.7, 29.3, 29.5, 29.8, 31.8, 31.9, 33.5, 35.0, 131.4, 134.3, 135.6, 175.5, 196.9 ppm. **HRMS (EI)** calc. for  $[\text{C}_{19}\text{H}_{32}\text{O}]^+$  276.2453, found 276.2453.

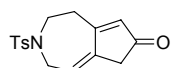

3-tosyl-1,2,3,4-tetrahydrocyclopenta[d]azepin-7(6H)-one (**9b**)

**IR** ( $\nu_{\text{CO}}$ ): 1680  $\text{cm}^{-1}$ .  **$^1\text{H NMR}$**  (300 MHz,  $\text{CDCl}_3$ )  $\delta$  2.43 (s, 3 H), 3.03 (s, 2 H), 3.07 (t,  $J = 5.3$  Hz, 2 H), 3.42 (t,  $J = 5.3$  Hz, 2 H), 4.08 (d,  $J = 3.9$  Hz, 2 H), 5.75 (t,  $J = 4.0$  Hz, 1 H), 6.13 (s, 1 H), 7.33 (d,  $J = 8.1$  Hz, 2 H), 7.69 (d,  $J = 8.2$  Hz, 2 H) ppm.  **$^{13}\text{C NMR}$**  (75 MHz,  $\text{CDCl}_3$ )  $\delta$  21.7, 33.8, 42.8, 46.0, 50.0, 124.2, 127.2, 130.1, 135.0, 135.7, 136.9, 144.0, 169.8, 204.2 ppm. **HRMS (EI)** calc. for  $[\text{C}_{16}\text{H}_{17}\text{NO}_3\text{S}]^+$  303.0929, found 303.0926.

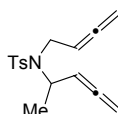

*N*-(buta-2,3-dienyl)-4-methyl-*N*-(penta-3,4-dien-2-yl)benzenesulfonamide (**10a**)

**IR** ( $\nu_{\text{allene}}$ ): 1953  $\text{cm}^{-1}$ .  **$^1\text{H NMR}$**  (300 MHz,  $\text{CDCl}_3$ )  $\delta$  1.22 (d,  $J = 6.8$  Hz, 3 H), 2.41 (s, 3 H), 3.74 (tdd,  $J = 2.1$  Hz, 7.2 Hz, 15.7 Hz, 1 H), 3.89 (m, 1 H), 4.63 (m, 1 H), 4.75 (m, 4 H), 4.95 (dd,  $J = 6.4$  Hz, 11.9 Hz, 1 H), 5.20 (m, 1 H), 7.29 (d,  $J = 8.1$  Hz, 2 H), 7.72 (d,  $J = 8.2$  Hz, 2 H) ppm.  **$^{13}\text{C NMR}$**  (75 MHz,  $\text{CDCl}_3$ )  $\delta$  18.7, 21.5, 42.7, 51.7, 76.3, 77.7, 89.4, 91.7, 127.2, 129.7, 138.1, 143.2, 208.6, 208.7 ppm. **HRMS (EI)** calc. for  $[\text{C}_{16}\text{H}_{19}\text{NO}_2\text{S}]^+$  289.1136, found 289.1139.

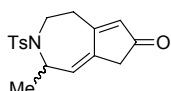

4-methyl-3-tosyl-1,2,3,4-tetrahydrocyclopenta[d]azepin-7(6H)-one (**10b**)

**IR** ( $\nu_{\text{CO}}$ ): 1681  $\text{cm}^{-1}$ .  **$^1\text{H NMR}$**  (300 MHz,  $\text{CDCl}_3$ )  $\delta$  1.13 (d,  $J = 6.9$  Hz, 3 H), 2.42 (s, 3 H), 3.01 (s, 2 H), 2.94-3.13 (m, 2 H), 3.23 (m, 1 H), 3.90 (tdd,  $J = 1.0$  Hz, 3.3 Hz, 14.9 Hz, 1 H), 4.94 (m, 1 H), 5.67 (d,  $J = 5.1$  Hz, 1 H), 6.10 (s, 1 H), 7.28 (m,  $J = 8.3$  Hz, 2 H), 7.72 (d,  $J = 8.4$  Hz, 2 H) ppm.  **$^{13}\text{C NMR}$**  (75 MHz,  $\text{CDCl}_3$ )  $\delta$  18.2, 21.7, 34.3, 39.8, 43.2, 54.3, 127.2, 130.0, 130.7, 134.7, 135.2, 138.4, 143.7, 170.2, 204.2 ppm. **HRMS (EI)** calc. for  $[\text{C}_{17}\text{H}_{19}\text{NO}_3\text{S}]^+$  317.1086, found 317.1089.

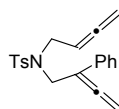

*N*-(buta-2,3-dienyl)-4-methyl-*N*-(2-phenylbuta-2,3-dienyl)benzenesulfonamide (**11a**)

**IR** ( $\nu_{\text{allene}}$ ): 1946  $\text{cm}^{-1}$ .  **$^1\text{H NMR}$**  (300 MHz,  $\text{CDCl}_3$ )  $\delta$  2.41 (s, 3 H), 3.85 (td,  $J = 2.5$  Hz, 7.0 Hz, 2 H), 4.33 (t,  $J = 2.4$  Hz, 2 H), 4.62 (td,  $J = 2.5$  Hz, 6.6 Hz, 2 H), 4.84 (m, 1 H), 5.04 (t,  $J = 2.4$  Hz, 2 H), 7.26 (m, 5 H), 7.46 (d,  $J = 7.3$  Hz, 2 H), 7.69 (d,  $J = 8.3$  Hz, 2 H) ppm.  **$^{13}\text{C NMR}$**  (75 MHz,  $\text{CDCl}_3$ )  $\delta$  21.6, 45.8, 47.2, 76.1, 79.1, 85.3, 100.8, 126.6, 127.4, 127.5, 128.6, 129.8, 133.8, 137.3, 143.5, 209.6, 210.0 ppm. **HRMS** (EI) calc. for  $[\text{C}_{21}\text{H}_{21}\text{NO}_2\text{S}]^+$  351.1293, found 351.1291.

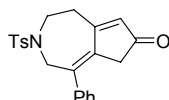

5-phenyl-3-tosyl-1,2,3,4-tetrahydrocyclopenta[d]azepin-7(6H)-one (**11b**)

**IR** ( $\nu_{\text{CO}}$ ): 1680  $\text{cm}^{-1}$ .  **$^1\text{H NMR}$**  (300 MHz,  $\text{CDCl}_3$ )  $\delta$  2.38 (s, 3 H), 2.77 (s, 2 H), 3.06 (t,  $J = 6.2$  Hz, 2 H), 3.64 (t,  $J = 6.2$  Hz, 2 H), 4.41 (s, 2 H), 5.98 (s, 1 H), 7.21 (d,  $J = 8.0$  Hz, 2 H), 7.34-7.41 (m, 5 H), 7.62 (d,  $J = 8.0$  Hz, 2 H) ppm.  **$^{13}\text{C NMR}$**  (75 MHz,  $\text{CDCl}_3$ )  $\delta$  21.7, 32.1, 42.8, 46.0, 52.2, 127.3, 128.4, 128.6, 129.1, 129.9, 133.6(2), 133.6(3), 136.3, 138.6, 140.2, 144.0, 169.9, 204.3 ppm. **HRMS** (EI) calc. for  $[\text{C}_{22}\text{H}_{21}\text{NO}_3\text{S}]^+$  379.1242, found 379.1244.

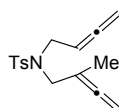

*N*-(buta-2,3-dienyl)-4-methyl-*N*-(2-methylbuta-2,3-dienyl)benzenesulfonamide (**12a**)

**IR** ( $\nu_{\text{allene}}$ ): 1956  $\text{cm}^{-1}$ .  **$^1\text{H NMR}$**  (300 MHz,  $\text{CDCl}_3$ )  $\delta$  1.67 (t,  $J = 3.0$  Hz, 3 H), 2.41 (s, 3 H), 3.81 (t,  $J = 2.2$  Hz, 2 H), 3.86 (td,  $J = 2.3$  Hz, 7.1 Hz, 2 H), 4.61 (td,  $J = 2.9$  Hz, 5.5 Hz, 2 H), 4.66 (m, 2 H), 4.85 (m, 1 H), 7.29 (d,  $J = 8.2$  Hz, 2 H), 7.70 (d,  $J = 8.3$  Hz, 2 H) ppm.  **$^{13}\text{C NMR}$**  (75 MHz,  $\text{CDCl}_3$ )  $\delta$  16.0, 21.6, 45.8, 50.3, 75.1, 76.0, 85.3, 94.1, 127.3, 129.7, 137.8, 143.3, 207.8, 209.8 ppm. **HRMS** (EI) calc. for  $[\text{C}_{16}\text{H}_{19}\text{NO}_2\text{S}]^+$  289.1136, found 289.1140.

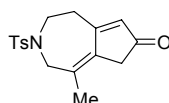

5-methyl-3-tosyl-1,2,3,4-tetrahydrocyclopenta[d]azepin-7(6H)-one (**12b**)

**IR** ( $\nu_{\text{CO}}$ ): 1679  $\text{cm}^{-1}$ .  **$^1\text{H NMR}$**  (300 MHz,  $\text{CDCl}_3$ )  $\delta$  1.82 (s, 3 H), 2.42 (s, 3 H), 2.86 (s, 2 H), 3.00 (t,  $J = 5.8$  Hz, 2 H), 3.49 (t,  $J = 5.8$  Hz, 2 H), 4.03 (s, 2 H), 5.98 (s, 1 H), 7.29 (d,  $J = 8.2$  Hz, 2 H), 7.65 (d,  $J = 8.3$  Hz, 2 H) ppm.  **$^{13}\text{C NMR}$**  (75 MHz,  $\text{CDCl}_3$ )  $\delta$  21.3, 21.7, 32.9, 41.6, 45.8, 52.7, 127.2, 130.0, 133.0, 133.7, 134.1, 136.4, 143.9, 170.4, 203.9 ppm. **HRMS** (EI) calc. for  $[\text{C}_{17}\text{H}_{19}\text{NO}_3\text{S}]^+$  317.1086, found 317.1082.

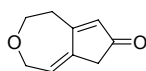

4,5-dihydro-2H-cyclopenta[d]oxepin-7(8H)-one (**13b**)

**IR** ( $\nu_{\text{CO}}$ ): 1673  $\text{cm}^{-1}$ .  **$^1\text{H NMR}$**  (300 MHz,  $\text{CDCl}_3$ )  $\delta$  3.04 (t,  $J = 5.1$  Hz, 2 H), 3.07 (d,  $J = 0.8$  Hz, 2 H), 3.88 (t,  $J = 5.1$  Hz, 2 H), 4.45 (dd,  $J = 1.0$  Hz, 3.2 Hz, 2 H), 5.77 (dt,  $J = 1.6$  Hz, 3.1 Hz, 1 H), 6.13 (s, 1 H) ppm.  **$^{13}\text{C NMR}$**  (75 MHz,  $\text{CDCl}_3$ )  $\delta$  35.1, 42.7, 67.9, 71.7, 128.2, 134.2, 135.7, 171.2, 204.9 ppm. **HRMS** (EI) calc. for  $[\text{C}_9\text{H}_{10}\text{O}_2]^+$  150.0681, found 150.0678.
